# Supplementary material
Source: MDPI journal article supplement (https://www.mdpi.com/2073-4395/12/11/2611)
Supplement: s1 [file s1]

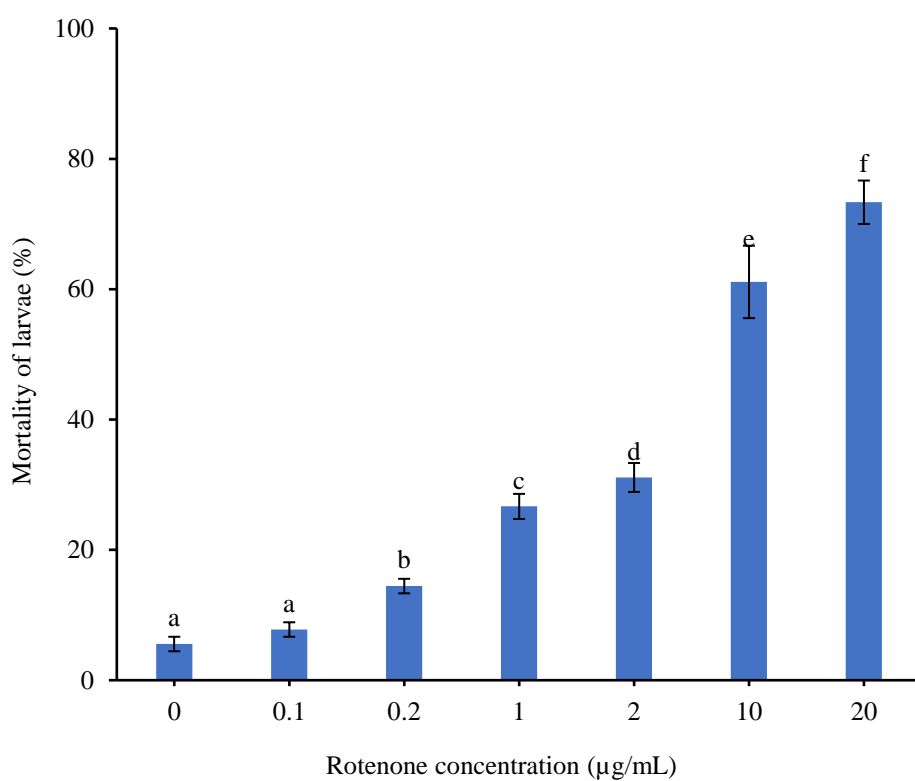

**Figure S1.** Mortality rates of *S. litura* after three days of treating different concentrations of rotenone.

Note: The '0' on the x-axis was the control, which means without rotenone treatment. Data are presented as mean  $\pm$  standard error (S.E.). Different letters indicate significant differences in mortality among treatments due to concentration effects at  $p < 0.05$  level based on Tukey's honestly significant difference (HSD) test ( $n = 3$ ).
